# Supplementary material for: De Novo Assembly Discovered Novel Structures in Genome of Plastids and Revealed Divergent Inverted Repeats in Mammillaria (Cactaceae, Caryophyllales)
Source: MDPI journal article supplement (doi:10.3390/plants8100392), 2019-10-01

## Supplementary Material

**Table S1.** Primer sequences designed for PCR verifications for flanking adjacent sequences of IRs; and gene rearrangements located at LSC in three genomes structures of *Mammillaria*. In the last column the temperature used to amplify each locus for all species. Primer design was based on the DNA sequences of *M. albiflora* (structure 1), *M. supertexta* (structure 2) and *M. zephyranthoides* (structure 3).

| Locus name   | Primer Sequence (5'-)                                               | Structure identified                                                                                                                                                                        | T (°C) |
|--------------|---------------------------------------------------------------------|---------------------------------------------------------------------------------------------------------------------------------------------------------------------------------------------|--------|
| rpls19-rps16 | Frps19 CGGTGCAAATTCTCCCAATT<br>Rrps16 CGTTGCTTTCTACCACATCG          | This locus amplifies only if the flanking of IRB has rps19-trnQ (Structure 2)                                                                                                               | 57     |
| rpl2-ycf2    | 3Frpl2 TCCCCTCTTTTGCAATCAGT<br>3Rycf2 AAGCGCCCAACTCATAATTG          | This locus amplifies for IRB of the three structures; however, the PCR product has nearly a double size for structure 3, because it has psbA inserted in IRB.                               | 57     |
| ycf2-rpl23   | 11F TGTTGATACAAAGCAGCCA<br>11F ACCCGATTGAAGCGTAATGA                 | This locus amplifies the ycf2-rpl23 of IRB in three structures. It was not expected to amplify in structure 3 but the Sanger sequencing discovered rpl23 in its IRB.                        | 56     |
| ndhB-rpl2    | 9F TTGGAGATTGGATGCGTTA<br>9R ACGTCTTGTGGGATAGCATT                   | This locus amplifies flanking and the end part of IRB of Structure 2. It amplifies a smallest product for Structure 1 and it does not amplify for Structure 3.                              | 57     |
| psbA-trnK    | FpsbAzep TGGAGGAGCAGCAATGAAGG<br>RtrnKzep TGTGCTAGAACTTTGGCTCGT     | This locus amplifies the flanking of IRA of structure 3.                                                                                                                                    | 60     |
| trnP-rpl20   | FMzeptnP GTAGCGCGTTTGTTTTGG<br>RMzeprpl20<br>TGACTAGAGTTAGACGGGGATA | This locus amplifies only if the gene arrangement of trnP-rpl20 of structure 3 is                                                                                                           | 58     |
| trnS-psbZ    | 30F TACCTTGACACCARAGAGRG<br>30RCACCGCTTCCACAGCTTTCT                 | This locus only amplifies for structure 3, or unspecific PCR product of nearly 300 bp may be obtained for Structures 1 and 2, which are eliminated by increasing the alignment temperature. | 57     |

**Supplementary material (continued).** Examples of PCR verifications carried out to test gene rearrangements found in seven species of *Mammillaria*. Standard PCR cycle was carried consisted of initial denaturation at 95°C-3 min, and 34 cycles included denaturing at 95 °C -45 sec, primer alignment (57-60 °C)-40", synthesis at 72°C -1.15 min; and final extension at 72°C -5 min. In all photos are presented PCR results run in agarose gels 1.5% stained with Syber Safe and visualized with UV light, and the size was referred to 1 Kb Plus DNA ladder with smallest line is of

100 bp. In all gels the samples were loaded in lanes in alphabetical order from left to the right: *M. albiflora*, *M. crucigera*, *M. huitzilopochtli*, *M. pectinifera*, *M. solisioides*, *M. supertexta* and *M. zephyranthoides*.

a) Gene rearrangement of psbZ-trnS. The pair of primers 30F/30F only amplifies the segment of psbZ-trnS with the orientation recorded in the structure 3. The unspecific weak products were eliminated by increasing 1-2 °C s the alignment primers temperature.

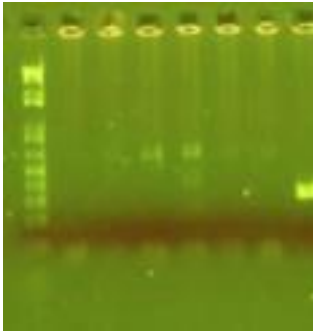

b) To the right of the gel the PCR obtained with the pair of primers 9F/9R (locus ndhB-rpl2) from lanes numbered from 50-56. In structure 3 this locus does not amplified, since these genes have not the same order to that found in structures 1 and 2. The left gel is placed in order to have the DNA ladder size.

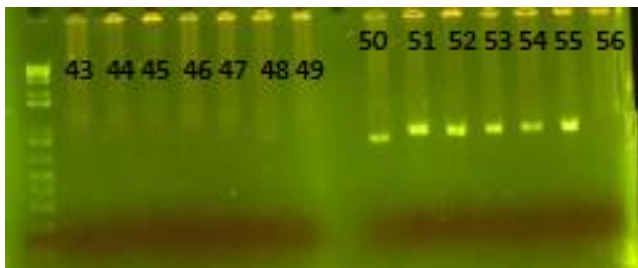

c) PCR amplification obtained for locus 3F/3R, which amplified rpl23-ycf2 of IRB for seven species, but in species with structure 3 it has a heavier band because it has inserted psbA at IRB.

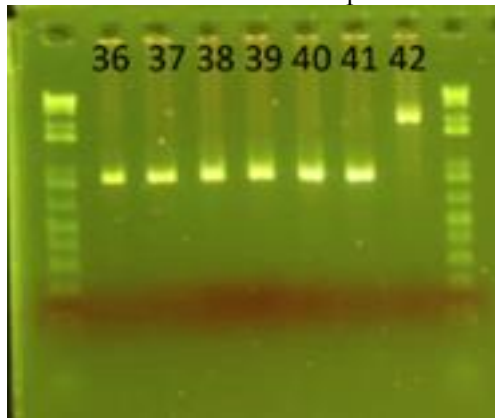

d) PCR result to test the locus rps19-rps16 of IRB of structure 2, which is absent in species with structure 1 and structure 3, and consequently this locus did not amplify.

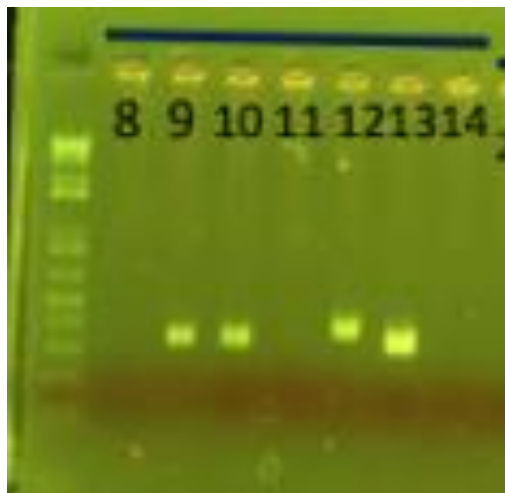

Supplement: s1 [file s1]
