# Supplementary material for: De Novo Assembly Discovered Novel Structures in Genome of Plastids and Revealed Divergent Inverted Repeats in Mammillaria (Cactaceae, Caryophyllales)
Source: MDPI journal article supplement (doi:10.3390/plants8100392), 2019-10-01
Supplement: s1 [file s1]

*Supplementary material*

**Table S2.** List of the total of 42 coding loci were used to obtain phylogenetic relationships of the seven species of *Mammillaria* studied and the two species used as outgroups *Carnegiea gigantea* and *Portulaca oleracea*.

| # Species | Genes             | Alg.-Conn.      | <i>M_albiflora</i>        |          |          | <i>M_crucigera</i> |          |          | <i>M_huitzilopochtli</i> |                |                | <i>M_pectinifera</i> |  | <i>M_solisoides</i> |  | <i>M_supertexta</i> |  | <i>M_zephyranthoides</i> |  |
|-----------|-------------------|-----------------|---------------------------|----------|----------|--------------------|----------|----------|--------------------------|----------------|----------------|----------------------|--|---------------------|--|---------------------|--|--------------------------|--|
|           | <i>Carnegieia</i> | <i>gigantea</i> | <i>Portulaca_oleracea</i> |          |          |                    |          |          |                          |                |                |                      |  |                     |  |                     |  |                          |  |
| 9         | 9                 | 0.94            | 01_psbJ                   | 04_psbJ  | 06_psbJ  | 13_psbJ            | 15_psbJ  | 19_psbJ  | 23_psbJ                  | YP_009159769.1 | YP_009441454.1 |                      |  |                     |  |                     |  |                          |  |
| 9         | 9                 | 0.94            | 01_petD                   | 04_petD  | 06_petD  | 13_petD            | 15_petD  | 19_petD  | 23_petD                  | YP_009159784.1 | YP_009441471.1 |                      |  |                     |  |                     |  |                          |  |
| 9         | 9                 | 0.939           | 01_rpoC2                  | 04_rpoC2 | 06_rpoC2 | 13_rpoC2           | 15_rpoC2 | 19_rpoC2 | 23_rpoC2                 | YP_009159816.1 | YP_009441430.1 |                      |  |                     |  |                     |  |                          |  |
| 9         | 9                 | 0.938           | 01_rpoC1                  | 04_rpoC1 | 06_rpoC1 | 13_rpoC1           | 15_rpoC1 | 19_rpoC1 | 23_rpoC1                 | YP_009159817.1 | YP_009441431.1 |                      |  |                     |  |                     |  |                          |  |
| 9         | 9                 | 0.938           | 01_rps4                   | 04_rps4  | 06_rps4  | 13_rps4            | 15_rps4  | 19_rps4  | 23_rps4                  | YP_009159761.1 | YP_009441442.1 |                      |  |                     |  |                     |  |                          |  |
| 9         | 9                 | 0.93            | 01_atpE                   | 04_atpE  | 06_atpE  | 13_atpE            | 15_atpE  | 19_atpE  | 23_atpE                  | YP_009159764.1 | YP_009441446.1 |                      |  |                     |  |                     |  |                          |  |
| 9         | 9                 | 0.924           | 01_cemA                   | 04_cemA  | 06_cemA  | 13_cemA            | 15_cemA  | 19_cemA  | 23_cemA                  | YP_009159767.1 | YP_009441452.1 |                      |  |                     |  |                     |  |                          |  |
| 9         | 9                 | 0.921           | 01_rpl16                  | 04_rpl16 | 06_rpl16 | 13_rpl16           | 15_rpl16 | 19_rpl16 | 23_rpl16                 | YP_009159791.1 | YP_009441478.1 |                      |  |                     |  |                     |  |                          |  |
| 9         | 9                 | 0.919           | 01_atpA                   | 04_atpA  | 06_atpA  | 13_atpA            | 15_atpA  | 19_atpA  | 23_atpA                  | YP_009159811.1 | YP_009441425.1 |                      |  |                     |  |                     |  |                          |  |
| 9         | 9                 | 0.919           | 01_rpoA                   | 04_rpoA  | 06_rpoA  | 13_rpoA            | 15_rpoA  | 19_rpoA  | 23_rpoA                  | YP_009159785.1 | YP_009441472.1 |                      |  |                     |  |                     |  |                          |  |
| 9         | 9                 | 0.918           | 01_psbI                   | 04_psbI  | 06_psbI  | 13_psbI            | 15_psbI  | 19_psbI  | 23_psbI                  | YP_009159809.1 | YP_009441424.1 |                      |  |                     |  |                     |  |                          |  |
| 9         | 9                 | 0.917           | 01_atpI                   | 04_atpI  | 06_atpI  | 13_atpI            | 15_atpI  | 19_atpI  | 23_atpI                  | YP_009159814.1 | YP_009441428.1 |                      |  |                     |  |                     |  |                          |  |
| 9         | 9                 | 0.917           | 01_atpB                   | 04_atpB  | 06_atpB  | 13_atpB            | 15_atpB  | 19_atpB  | 23_atpB                  | YP_009159763.1 | YP_009441447.1 |                      |  |                     |  |                     |  |                          |  |
| 9         | 9                 | 0.916           | 01_matK                   | 04_matK  | 06_matK  | 13_matK            | 15_matK  | 19_matK  | 23_matK                  | YP_009159806.1 | YP_009441421.1 |                      |  |                     |  |                     |  |                          |  |
| 9         | 9                 | 0.914           | 01_psaB                   | 04_psaB  | 06_psaB  | 13_psaB            | 15_psaB  | 19_psaB  | 23_psaB                  | YP_009159825.1 | YP_009441439.1 |                      |  |                     |  |                     |  |                          |  |
| 9         | 9                 | 0.914           | 01_petA                   | 04_petA  | 06_petA  | 13_petA            | 15_petA  | 19_petA  | 23_petA                  | YP_009159768.1 | YP_009441453.1 |                      |  |                     |  |                     |  |                          |  |
| 9         | 9                 | 0.913           | 01_psbA                   | 04_psbA  | 06_psbA  | 13_psbA            | 15_psbA  | 19_psbA  | 23_psbA_b                | YP_009159805.1 | YP_009441420.1 |                      |  |                     |  |                     |  |                          |  |
| 9         | 9                 | 0.912           | 01_petG                   | 04_petG  | 06_petG  | 13_petG            | 15_petG  | 19_petG  | 23_petG                  | YP_009159774.1 | YP_009441459.1 |                      |  |                     |  |                     |  |                          |  |
| 9         | 9                 | 0.912           | 01_rbcL                   | 04_rbcL  | 06_rbcL  | 13_rbcL            | 15_rbcL  | 19_rbcL  | 23_rbcL                  | YP_009159762.1 | YP_009441448.1 |                      |  |                     |  |                     |  |                          |  |
| 9         | 9                 | 0.911           | 01_psbK                   | 04_psbK  | 06_psbK  | 13_psbK            | 15_psbK  | 19_psbK  | 23_psbK                  | YP_009159808.1 | YP_009441423.1 |                      |  |                     |  |                     |  |                          |  |
| 9         | 9                 | 0.91            | 01_psaC                   | 04_psaC  | 06_psaC  | 13_psaC            | 15_psaC  | 19_psaC  | 23_psaC                  | YP_009159799.1 | YP_009441491.1 |                      |  |                     |  |                     |  |                          |  |
| 9         | 9                 | 0.91            | 01_psbE                   | 04_psbE  | 06_psbE  | 13_psbE            | 15_psbE  | 19_psbE  | 23_psbE                  | YP_009159772.1 | YP_009441457.1 |                      |  |                     |  |                     |  |                          |  |
| 9         | 9                 | 0.91            | 01_psaA                   | 04_psaA  | 06_psaA  | 13_psaA            | 15_psaA  | 19_psaA  | 23_psaA                  | YP_009159759.1 | YP_009441440.1 |                      |  |                     |  |                     |  |                          |  |
| 9         | 9                 | 0.909           | 01_psbL                   | 04_psbL  | 06_psbL  | 13_psbL            | 15_psbL  | 19_psbL  | 23_psbL                  | YP_009159770.1 | YP_009441455.1 |                      |  |                     |  |                     |  |                          |  |
| 9         | 9                 | 0.908           | 01_atpH                   | 04_atpH  | 06_atpH  | 13_atpH            | 15_atpH  | 19_atpH  | 23_atpH                  | YP_009159813.1 | YP_009441427.1 |                      |  |                     |  |                     |  |                          |  |
| 9         | 9                 | 0.907           | 01_psbB                   | 04_psbB  | 06_psbB  | 13_psbB            | 15_psbB  | 19_psbB  | 23_psbB                  | YP_009159779.1 | YP_009441466.1 |                      |  |                     |  |                     |  |                          |  |
| 9         | 9                 | 0.906           | 01_psbC                   | 04_psbC  | 06_psbC  | 13_psbC            | 15_psbC  | 19_psbC  | 23_psbC                  | YP_009159822.1 | YP_009441436.1 |                      |  |                     |  |                     |  |                          |  |
| 9         | 9                 | 0.904           | 01_rps8                   | 04_rps8  | 06_rps8  | 13_rps8            | 15_rps8  | 19_rps8  | 23_rps8                  | YP_009159789.1 | YP_009441476.1 |                      |  |                     |  |                     |  |                          |  |
| 9         | 9                 | 0.903           | 01_rps15                  | 04_rps15 | 06_rps15 | 13_rps15           | 15_rps15 | 19_rps15 | 23_rps15                 | YP_009159798.1 | YP_009441497.1 |                      |  |                     |  |                     |  |                          |  |
| 9         | 9                 | 0.902           | 01_psbD                   | 04_psbD  | 06_psbD  | 13_psbD            | 15_psbD  | 19_psbD  | 23_psbD                  | YP_009159821.1 | YP_009441435.1 |                      |  |                     |  |                     |  |                          |  |
| 9         | 9                 | 0.9             | 01_petB                   | 04_petB  | 06_petB  | 13_petB            | 15_petB  | 19_petB  | 23_petB                  | YP_009159783.1 | YP_009441470.1 |                      |  |                     |  |                     |  |                          |  |
| 9         | 9                 | 0.899           | 01_ccsA                   | 04_ccsA  | 06_ccsA  | 13_ccsA            | 15_ccsA  | 19_ccsA  | 23_ccsA                  | YP_009159800.1 | YP_009441489.1 |                      |  |                     |  |                     |  |                          |  |
| 9         | 9                 | 0.899           | 01_petN                   | 04_petN  | 06_petN  | 13_petN            | 15_petN  | 19_petN  | 23_petN                  | YP_009159819.1 | YP_009441433.1 |                      |  |                     |  |                     |  |                          |  |
| 9         | 9                 | 0.899           | 01_rps14                  | 04_rps14 | 06_rps14 | 13_rps14           | 15_rps14 | 19_rps14 | 23_rps14                 | YP_009159824.1 | YP_009441438.1 |                      |  |                     |  |                     |  |                          |  |
| 9         | 9                 | 0.89            | 01_psbT                   | 04_psbT  | 06_psbT  | 13_psbT            | 15_psbT  | 19_psbT  | 23_psbT                  | YP_009159780.1 | YP_009441467.1 |                      |  |                     |  |                     |  |                          |  |
| 9         | 9                 | 0.882           | 01_psbN                   | 04_psbN  | 06_psbN  | 13_psbN            | 15_psbN  | 19_psbN  | 23_psbN                  | YP_009159781.1 | YP_009441468.1 |                      |  |                     |  |                     |  |                          |  |

|   |    |       |          |          |          |          |          |          |            |                |                               |
|---|----|-------|----------|----------|----------|----------|----------|----------|------------|----------------|-------------------------------|
| 9 | 9  | 0.881 | 01_rpl14 | 04_rpl14 | 06_rpl14 | 13_rpl14 | 15_rpl14 | 19_rpl14 | 23_rpl14   | YP_009159790.1 | YP_009441477.1                |
| 9 | 9  | 0.878 | 01_psbF  | 04_psbF  | 06_psbF  | 13_psbF  | 15_psbF  | 19_psbF  | 23_psbF    | YP_009159771.1 | YP_009441456.1                |
| 9 | 9  | 0.87  | 01_rps2  | 04_rps2  | 06_rps2  | 13_rps2  | 15_rps2  | 19_rps2  | 23_rps2    | YP_009159815.1 | YP_009441429.1                |
| 9 | 9  | 0.866 | 01_petL  | 04_petL  | 06_petL  | 13_petL  | 15_petL  | 19_petL  | 23_petL    | YP_009159773.1 | YP_009441458.1                |
| 9 | 9  | 0.841 | 01_rps3  | 04_rps3  | 06_rps3  | 13_rps3  | 15_rps3  | 19_rps3  | 23_rps3    | YP_009159792.1 | YP_009441479.1                |
| 9 | 9  | 0.838 | 01_psbH  | 04_psbH  | 06_psbH  | 13_psbH  | 15_psbH  | 19_psbH  | 23_psbH    | YP_009159782.1 | YP_009441469.1                |
| 9 | 9  | 0.766 | 01_rps11 | 04_rps11 | 06_rps11 | 13_rps11 | 15_rps11 | 19_rps11 | 23_rps11   | YP_009159786.1 | YP_009441473.1                |
| 9 | 9  | 0.698 | 01_infA  | 04_infA  | 06_infA  | 13_infA  | 15_infA  | 19_infA  | 23_infA    | YP_009159788.1 | YP_009441475.1                |
| 9 | 9  | 0.693 | 01_rpl20 | 04_rpl20 | 06_rpl20 | 13_rpl20 | 15_rpl20 | 19_rpl20 | 23_rpl20   | YP_009159777.1 | YP_009441463.1                |
| 9 | 9  | 0.663 | 01_rps19 | 04_rps19 | 06_rps19 | 13_rps19 | 15_rps19 | 19_rps19 | 23_rps19   | YP_009159794.1 | YP_009441481.1                |
| 9 | 9  | 0.65  | 01_rpoB  | 04_rpoB  | 06_rpoB  | 13_rpoB  | 15_rpoB  | 19_rpoB  | 23_rpoB    | YP_009159818.1 | YP_009441432.1                |
| 9 | 9  | 0.45  | 01_rpl22 | 04_rpl22 | 06_rpl22 | 13_rpl22 | 15_rpl22 | 19_rpl22 | 23_rpl22   | YP_009159793.1 | YP_009441480.1                |
| 9 | 10 | 0.763 | 01_rpl2  | 04_rpl2  | 06_rpl2  | 13_rpl2  | 15_rpl2  | 19_rpl2  | 23_rpl2    | YP_009159795.1 | YP_009441482.1,YP_009441503.1 |
| 9 | 10 | 0.705 | 01_rps7  | 04_rps7  | 06_rps7  | 13_rps7  | 15_rps7  | 19_rps7  | 23_rps7    | YP_009159804.1 | YP_009441486.1,YP_009441499.1 |
| 8 | 8  | 0.913 | 01_psbZ  | 04_psbZ  | 06_psbZ  | 13_psbZ  | 15_psbZ  | 19_psbZ  | *          | YP_009159823.1 | YP_009441437.1                |
| 8 | 8  | 0.906 | *        | 04_psaI  | 06_psaI  | 13_psaI  | 15_psaI  | 19_psaI  | 23_psaI    | YP_009159765.1 | YP_009441450.1                |
| 8 | 8  | 0.714 | 01_rpl32 | 04_rpl32 | 06_rpl32 | 13_rpl32 | 15_rpl32 | 19_rpl32 | 23_rpl32_a | YP_009159801.1 | *                             |
| 7 | 7  | 0.385 | 01_psbM  | 04_psbM  | *        | 13_psbM  | 15_psbM  | *        | 23_psbM    | YP_009159820.1 | YP_009441434.1                |
| 6 | 6  | 0.94  | *        | 04_psaJ  | 06_psaJ  | 13_psaJ  | 15_psaJ  | 19_psaJ  | 23_psaJ    | *              | *                             |
| 3 | 3  | 0.946 | 01_psaJ  | *        | *        | *        | *        | *        | *          | YP_009159775.1 | YP_009441460.1                |
| 2 | 3  | 0.333 | *        | *        | *        | *        | *        | *        | *          | YP_009159796.1 | YP_009441484.1,YP_009441501.1 |
| 2 | 3  | 0.333 | *        | *        | *        | *        | *        | *        | *          | YP_009159778.1 | YP_009441419.1,YP_009441464.1 |
| 2 | 2  | 1     | *        | *        | *        | *        | *        | *        | *          | YP_009159812.1 | YP_009441426.1                |
| 2 | 2  | 1     | *        | *        | *        | *        | *        | *        | *          | YP_009159810.1 | YP_009441465.1                |
| 2 | 2  | 1     | *        | *        | *        | *        | *        | *        | *          | YP_009159807.1 | YP_009441422.1                |
| 2 | 2  | 1     | *        | *        | *        | *        | *        | *        | *          | YP_009159797.1 | YP_009441498.1                |
| 2 | 2  | 1     | *        | *        | 06_psbM  | *        | *        | 19_psbM  | *          | *              | *                             |
| 2 | 2  | 1     | *        | *        | *        | *        | *        | *        | *          | YP_009159776.1 | YP_009441462.1                |
| 2 | 2  | 1     | *        | *        | *        | *        | *        | *        | *          | YP_009159766.1 | YP_009441451.1                |
| 2 | 2  | 1     | *        | *        | *        | *        | *        | *        | *          | YP_009159760.1 | YP_009441441.1                |
| 2 | 2  | 1     | *        | *        | *        | *        | *        | *        | *          | YP_009159787.1 | YP_009441474.1                |
