# Supplementary material for: De Novo Assembly Discovered Novel Structures in Genome of Plastids and Revealed Divergent Inverted Repeats in Mammillaria (Cactaceae, Caryophyllales)
Source: Plants (Basel). 2019 Oct 1;8(10):392. doi: 10.3390/plants8100392 (PMC6843559; doi:10.3390/plants8100392)
Supplement: Supplementary file 1 [file plants-08-00392-s001.zip]

Archive with 4 entries (4 files):
- SuplementaryTables/SuplementayMaterialS2.588434.doc
- SuplementaryTables/SuplementayMaterialS2.588434.pdf
- SuplementaryTables/SupplementaryMaterialS1.588434.doc
- SuplementaryTables/SupplementaryMaterialS1.588434.pdf
